# Supplementary material
Source: PubMed Central journal article supplement (PMC1761160)

**The physician as opera character -  
a reflection of medical history and public perception**

Stefan N. Willich

Institute for Social Medicine, Epidemiology and Health Economics

Charité University Medical Center

Humboldt University of Berlin, Germany

Address for correspondence:

Prof. Stefan N. Willich

Institute for Social Medicine, Epidemiology and Health Economics

Charité University Medical Center

10098 Berlin, Germany

Tel: 030-450 529002, Fax: 030-450 529902

E-mail: stefan.willich@charite.de

**The Physician as Opera Character -  
A Reflection of Medical History and Public Perception**

**Abstract/ Summary**

Physician characters appear in about 10% of the opera repertoire. The doctor's importance, basis of knowledge, social status, and role in the opera change in the historic development of opera. Whereas in the 18<sup>th</sup> century the doctor does not have a healing function but plays a buffoon in a supportive role, in the 19<sup>th</sup> century he appears both as charlatan and already as a scientifically trained physician. In the 20<sup>th</sup> century, the doctor plays a major role in a socially superior position and, in addition to being a clinician, he is often depicted as a researcher. The dynamics of the physician's role in opera history, on the one hand, reflects the development of medicine and, on the other hand, illustrates the development of the social position of doctors and the public attitude towards the medical profession over the last centuries.

**Key Words**

Physician, doctor, charlatan, opera, libretto, music

## **Introduction and methodological considerations**

Music is arguably the most abstract form of art. It was long considered one of the seven ‘artes liberales’ at European universities (along with grammar, dialectic, rhetoric, arithmetic, geometry and astronomy) that were a prerequisite for advanced graduate studies (1). In modern times, music has played an increasingly important role in medicine, such as in anxiolytic and psychotherapeutic approaches, and also in the specific medical care for artists (2). But what about the representation of medicine in music? Does it exist, and if so, what is its possible background and significance? These questions will be explored using the model of the physician in the opera genre.

A systematic search in standard theatrical reference books yielded some 40 operas from three centuries in which physicians appear on stage (Table 1). In view of the approximately 400 works belonging to the contemporary repertoire, this does account for approximately 10% of the operas. Thus, it was surprising that an extensive search in the literature, both in the areas of medicine and music theory, yielded only a few reports published on this subject including a systematic review by Estes (3).

Several operas were selected as specific examples to illustrate important aspects of our subject. This selection was done under the premise of a longitudinal section through the history of opera and of a focus on works in which physicians play a relatively prominent role, as opposed to appearance as extras or in speaking roles. Operettas and musicals were not considered in the present paper. Using a structural approach (in a simplified form), the role and function of the physician was analyzed in different categories including the character and importance of his role, his function and basis of knowledge, and his social status in the opera. In addition, the physician and his role is understood as an important element, as text in the broader sense, and is thus accessible to contextual interpretations (4).

The structural approach was supplemented by a historical view. Reference to the historical background is imperative, since the concretization of the physician’s image also carries with it

time-conditioned judgments and values such as individual attitudes of the artist. Beside the structural and historical analysis, the biographical analysis of the respective artists should be added as a further potential means of access to the textual interpretation. The position of the particular opera within the context of the composer's or librettist's oeuvre, as well as individual experiences of the artists in terms of health, illness and medical care may be important components of an artistic creation. The latter aspects, however, are only fleetingly touched upon in this paper.

### **Historical overview**

Opera history begins in the late Renaissance and early Baroque (5,6). There are no doctor characters in the operas of Monteverdi, Gluck or Händel in part because the stories are often based on material from mythology or antiquity. At best, Apollo, the ancient Greek god of healing and music, appears in some of the works. In the 18<sup>th</sup> century, at the height of the classical period, there are only a few doctor characters, all of them belonging to the field of comic opera (Table 1).

In Mozart's "Cosi fan tutte" (Women are like that) the chambermaid Despina appears disguised as a physician to cure patients who pretend to have taken poison in this game of confusion about female fidelity and infidelity. The mixture of seriousness and humor, typical of Mozart operas, the cascades of complementing and diverse ideas (7) meet with the courtly festive culture of the 17<sup>th</sup> and 18<sup>th</sup> century in which masquerades and allegorical plays had a firm place. At the occasion of the anniversary of the Elector of Brandenburg in 1700, a feast was given in the city of Charlottenburg which featured the replica of a village market with the usual barkers, conjurers and tooth breakers. The Electress disguised herself as a physician selling magic potions, thereby participating in a masquerade (8). Satire at that time allowed the part of the physician to be played by both a chambermaid and an electress. The interest of the educated class in medicine and pharmacotherapeutics was characterized by the realization

that man in the end must die in spite of the existence of physicians or, according to numerous satirical pamphlets, because man places his trust in doctors. A unified medical profession with a generally binding training curriculum did not exist at that time. Apart from academically trained medical doctors, primarily surgeons and barbers treated external diseases. Also, sometimes, lay healers such as shepherds and executioners were granted royal privileges for the treatment of illnesses requiring minor surgical interventions. This difference goes hand in hand with a certain capriciousness in dispensing medical treatment which finds its counterpart in the artistic play with role switches and deception.

In the 19<sup>th</sup> and 20<sup>th</sup> century, there are several operas with physician characters (Table 1). In earlier works, physicians often appear in opera buffa (comic opera) while in later ones, they appear in the tragic romantic opera, the lyrical opera, the expressionistic opera and modern works. Some well-known composers are missing on this list, as for example Richard Wagner, whose work draws much from early medieval folk myths. At best, Brangäne in “Tristan and Isolde” could be interpreted as a nurse (10,11). Our review may not provide a comprehensive listing of contemporary operas with doctors due to the methodological difficulties in identifying all such works.

## **Eighteenth century**

### Example 1 (see libretto excerpt 1)

“Le nozze di Figaro” (The marriage of Figaro) is one of Wolfgang Amadeus Mozart’s great Italian operas (libretto by da Ponte after Beaumarchais). After the overture, the leading characters are introduced, among them Dr. Bartolo, a physician who does not appear in his genuine role as a healer but in an opposite function. Dr. Bartolo is angry at Figaro (excerpt 1) and threatens to take revenge on him for having once helped to abduct his ward Rosina, whom he would have liked to have married himself. Toward the end of the opera, however, Dr. Bartolo sides with Figaro, but not before he finds out by chance that Figaro is his long lost

son whom robbers had abducted as a baby. Dr. Bartolo and the described course of action are altogether of secondary importance. The opera deals primarily with the planned marriage of the leading character Figaro and with the feudalistic endeavors of his master, the Duke Almoviva, to claim the right of *ius primae noctis* (first wedding night) with Susanna, Figaro's prospective wife - much to the annoyance of the duchess who, in turn, amuses herself with Cherubino, the duke's servant.

Example 2 (see libretto excerpt 2)

In the same year as the Mozart opera, "Doktor and Apotheker" (Doctor and Pharmacist), an opera by Carl Ditters von Dittersdorf (libretto by Stephanie the Younger), also had its premiere in Vienna and is probably the best known of his approximately 40 plays. Dr. Krautmann is a physician in a small town in Germany and extols his importance in the introductory aria (excerpt 2a). The parodistic way in which this is done leaves doubts as to his real reputation. Dr. Krautmann and the pharmacist's daughter are in love with each other. When Stöbel finds out about this, he tries to marry his daughter off to an old friend. The young lovers try to prevent this with a masquerade. However, the plan fails initially and all the while, the two opponents clash violently time and again (excerpt 2b), each questioning the other's professional competence and threatening to take legal action.

The conflict between the physician and the pharmacist was predetermined because of the frequently overlapping areas of professional competence and was even partially exacerbated by government decrees. For example, in 1784, contrary to the existing laws for pharmacists, the government of the court diocese Osnabrück allowed a pharmacist, to treat small flesh wounds and abscesses and bleed patients in an emergency (12). In July 1796, a pharmacist was accorded the right to do surgery on the basis of an attestation testifying to his competence as a pharmacist and his skill as a surgeon (13). With these privileges, the authorities considerably aggravated the professional quarrels which then had to be settled in court. Indeed, in the 18<sup>th</sup> century, physicians often had to reckon with lawsuits and fines when their

treatment, which was based on irrational notions, did not bring the expected success. In addition, the activities of travelling doctors, which were largely performed publicly at fairs by craftsmen trained as surgeons, tooth pullers, cataract depressors and stone extractors, were rather difficult to control effectively. Although these healers were required to obtain a permit from the local administration, they often travelled on to the next place when the fair was over. This mobility made it easy for them to get out of town and avoid legal consequences for quackery. V. Dittersdorf uses this conflict as a creative element in his work and allows the physician to appear in his professional role albeit in a grotesque and parodistic manner.

### **Nineteenth century**

#### Example 3 (see libretto excerpt 3)

Romanticism saw an awakening of interest in old mythological subjects, like the story of Tristan and Isolde, whose central theme is a love potion (initially considered a death potion) that induces irresistible love (10). In Gaetano Donizetti's "L'elisir d'amore" (The Love Potion) (libretti by Romani), Nemorino, a simple peasant, is in love with Adina, the lady of the manor, who in turn is enamored of the military and flirts with a Captain Belcore. Nemorino knows the old tale of Tristan and Isolde and, when the travelling physician Dr. Dulcamara comes into town, he remembers the effect of the love potion. Considering the competition on the market for health services, advertisement on one's own behalf become quite important (excerpt 3a). There were no strict regulations in this regard compared to the present. It was also almost impossible to make sure that the few and very general rules were followed. Nemorino asks Dr. Dulcamara for a drug that provokes love and the latter sells him a bottle of Bordeaux wine as a love potion. Although the first dose dispels his sadness (Figure 1), Adina still remains unaffected. Nemorino grows surer of himself with a higher dose, and while he waits for the love potion to take effect, he dances with other village girls. Dr. Dulcamara obviously relies here on the disinhibiting effect of the alcohol. Nemorino's

behavior makes Adina jealous and she actually falls in love with him. As it is customary in the Italian opera buffa, the two marry and then Nemorino even inherits a considerable fortune. Dr. Dulcamara also exploits this opportunity of increasing his fame by claiming that Nemorino's sudden wealth is also due to the medication (excerpt 3b).

Dr. Dulcamara is one of the first physicians as a leading character in an opera and reflects to some extent the situation of medicine in the early 19<sup>th</sup> century (14). Some ideas still prevail that date back to antiquity and are based on Galen's humoralism. Humoral pathology was closely related to a total therapy (as the one proposed by Dulcamara) and was displaced in the course of the century by the development of solidistic and cellular pathology and the associated new assessment of diagnosis and therapy. This process obviously does not begin abruptly in the 19<sup>th</sup> century, on the contrary, for many, it starts already with Paracelsus (15). Nevertheless, 19<sup>th</sup> century with Virchow, Pasteur, Koch, Billroth, Mendel, Charcot, Pettenkofer, etc. is the era in which medicine is placed, in both diagnosis and therapy, on scientific foundations. The early evolution of a modern hospital system and modern medical faculty also took place during that time, such as the foundation of the New Paris Medical School in 1794).

In the 19<sup>th</sup> century, surgery, which had often been taken care of by barbers until that time, was integrated into medicine. In the opera "La Forza del Destino" (The Power of Destiny) by Giuseppe Verdi, a surgeon is of great importance for the plot though he has only a minor singing part (16). He removes a bullet from Don Alvaro's chest; the patient survives the procedure - only to die anyway caught up in a web of tragic entanglements at the end of the opera. In Donizetti's "Don Pasquale" (libretto by Anelli), the increasing power of the physician to exercise psychological influence is portrayed (17). In this opera, his name is, typically enough Dr. Malatesta (Dr. Headache), who "cleverly pulls the strings" by getting Norina to agree to sham marriage with the old Don Pasquale.

Example 4 (see libretto excerpt 4)



One of the best known tragic operas of the 19<sup>th</sup> century is “La Traviata” by Giuseppe Verdi (libretto by Piave after Dumas). Alfredo, who comes from a good house, falls in love with Violetta, a star of the Paris demi-mode. His father, fearing for the good name of the family, asks Violetta to let go of his son. She acquiesces without giving Alfredo the true reasons. The latter, mad with jealousy, exposes her as a prostitute at a feast. Subsequently, Violetta’s state of health deteriorates rapidly, probably due to progressive tuberculosis. Dr. Grenvil, her physician, supports her but predicts that she will soon die. In the end, Alfredo comes back to her after having been told the true story by his father. During the death scene at the end of the opera, the physician joins the other mourners (excerpt 4, Figure 2). Knowing that he cannot save his patient, he stays with her until she dies. Considering the well prepared and publicly staged social death of Violetta, the role of the physician, who is also helpless toward this societal death, is extended by a sympathetic and comforting aspect.

Example 5 (see libretto excerpt 5)

“Les contes D’Hoffmann” (Tales of Hoffmann) by Jacques Offenbach (libretto by Barbier) takes place in Lutter’s wine cellar, a pub. The leading character is based on E.T.A. Hoffmann who led a colorful life as a poet, musician, painter, designer and lawyer in Berlin in the early 19<sup>th</sup> century. In this opera, Hoffmann tells about the three unhappy love affairs in his life. His first great love, Olympia, turns out to be an automated doll, the second, Giulietta, is a courtesan in the grand style.

His third love, Antonia, is very beautiful and a gifted singer but is in a frail state of health. From her mother, who died young from a heart condition, she has inherited not only the beautiful voice but also the disease. Here, the concept of heredity is taken up, which was introduced in the last century. Dr. Miracle appears, allegedly to help Antonia with some medicine. But Hoffmann senses disaster in the guise of the doctor. Crespel, Antonia’s father, also has a dark forboding when Dr. Miracle first examines her and then asks her to sing (excerpt 5a). Dr. Miracle diagnoses cardiac arrhythmia, Antonia’s pulse is fast and irregular.

This is also depicted musically by interrupted 16<sup>th</sup> notes (3 each with a rest) in the accompanying voice, corresponding to an accompanying arrhythmia. The musical rendition of the pulse as a rhythm as far back as the 4<sup>th</sup> century (15). Galen further developed the theories on the correlation between the quality of the pulse and musical rhythm, and Françoise Marquet even published a special notation on pulse characterization in 1769 (15,18).

In a recent article, Dauber elucidated the forensic differential diagnosis of the hereditary causes of arrhythmia in connection with Antonia in Offenbach's opera (19). Of the 3 possibilities - prolonged QT interval, hypertrophic cardiomyopathy and mitral valve prolapse - the first seems to be the most unlikely since it is a rare, autosomal dominant hereditary disease sometimes associated with neural deafness (Romano-Ward syndrome). Many patients with hypertrophic cardiomyopathy exhibit signs of cardiac insufficiency, which is not apparent in Antonia's case. The clinical signs of mitral valve prolapse include a systolic click, fragile physical habitus, occasional dyspnea, states of anxiety and exhaustion and occasional supraventricular or ventricular arrhythmias. Sudden cardiac death occurs rarely but is described as a complication (20). Since, Antonia displays many of these described symptoms she may have suffered from this disorder. Nevertheless, Dr. Miracle asks her to sing, tempting her with the life of an artist that is much more exciting than a conventional life married to Hoffmann (21). Antonia sings and collapses on stage. The quickly summoned doctor (the dubious Dr. Miracle appears once again) arrives and pronounces her dead (excerpt 5b). Singing may thus have triggered the fatal arrhythmia (22,23).

The question arises whether Antonia's arrhythmia may not be a symbol for something that "has gotten out of rhythm". The three unhappy love affairs point toward a certain disorientation. If, however, love is depicted here as subordinated to a predisposition that is slightly pessimistic or somewhat chaotic - even in connection with an exciting but strenuous life as an artist - the role of the doctor has to be connected with this scenario. Though set against the artist, the scientist not only fails to resolve the chaos or support the persons

involved but actually brings the deadly consequence to its conclusion. That is to say, the scientist and doctor ends the chaos with death, which otherwise might not have occurred at all or not as quickly. Does the art of healing sometimes include a fatal function?

Another dramatic example of a doctor figure is found in “Lulu” by Alban Berg (adapted from Erdgeist, Pandora’s box, Wedeking), this time he dies himself - presumably of sudden cardiac death. In the first act, the leading character, Lulu poses for a painter who succumbs to her temptations. The two are caught in flagranti by Lulu’s spouse, a ‘Medizinalrat’ (state physician). Before he can strike them with his cane, he suddenly collapses and dies.

### **Twentieth century**

In some operas of the early 20<sup>th</sup> century, the doctor has only a small or just a speaking role, but usually in his practical function. In “Pelleas and Melisande” by Claude Debussy (libretto by Maeterlinck), the doctor, who is being consulted in the final scene, cannot help the dying Melisande. In “Der Rosenkavalier” (Knight of the Rose) by Richard Strauß (libretto by v. Hofmannsthal), the baron Ochs von Lerchenau is slightly wounded at the upper arm during a dispute with Octavian and attended to by a doctor.

#### Example 6 (see libretto excerpt 6)

One of the best known compositions of this century is Alban Berg’s “Wozzeck” after the drama of the same name written by Büchner almost 100 years earlier. Wozzeck is a soldier, uneducated and somewhat slow-witted, who works as a regimental servant for the captain of his company. In order to earn some extra money to support his wife Maria and their child, he puts himself at the disposal of the doctor who uses him for medical experiments and as ‘illustrative material’ for medical students (Figure 3). During a dietary experiment, Wozzeck is allowed to eat only legumes for one week and only meat for another (excerpt 6a). The doctor in “Wozzeck” bears resemblance to Justus v. Liebig, an important 19<sup>th</sup> century chemist and agronomist (3). The doctor is shown here primarily as a researcher for whom scientific

success is more important than Wozzeck as his patient. This becomes obvious when Wozzeck tells him about visual hallucinations and that he is hearing voices (excerpt 6b). The doctor reacts in an exalted and cynical manner in which his powerful position vis-à-vis the humiliated position of the patient becomes obvious, a stylized example of a failed doctor-patient relationship (17, 24).

The opera ends tragically. Wozzeck kills Marie and, departing from Büchner's drama, commits suicide. The historical model for Wozzeck was a barber who on the basis of a psychological examination was held fully responsible for the murder he had committed and was executed in Leipzig (25).

When "Wozzeck" was first performed in the mid-20's, discussions among doctors in Germany centered on the "crisis" in medicine. The background of this debate is multifaceted. It focused primarily on both the fear of a "proletarianization" of the medical profession and on violent attacks on the incompetence of traditional mechanistic and scientific medicine. For many doctors, the great popularity of the reform and naturopathy movement was symbolic of a loss of public confidence and authority and called conventional medicine into question. Both doctors and laypersons increasingly criticized the practice of human experiments as an inhuman method without benefit to the patient that served exclusively to further one's personal career (26, 27). In "Wozzeck", the negative portrayal of a scientist in the person of the doctor reflects the contemporary criticism of a physician who sacrifices the interests of the patient for the sake of his career. It also appears to forecast the dark role of medicine in the nazi regime in Germany a decade later.

The psychiatric element plays an important role in several contemporary operas, as, for example, in "Wir erreichen den Fluß" (We Come to the River) by Hans Werner Henze. In the second part of the opera, the protagonist (a general) is a patient in a psychiatric clinic. Henze's opera was first performed in London in 1976, and the inclusion of the psychiatric element reflects the discussion on medical problems taking place at that time in Europe. Since

the beginning of the 70's, there had been increasing criticism of the state of psychiatric care, especially from psychiatrists. The German Society on Psychiatry and Neurology had taken up this subject in 1971. The "Interim Report of the Expert Commission on the State of Psychiatry in the Federal Republic of Germany" published in 1973 paints a clear picture of the shortcomings. The subsequent intensive debate in the media apparently also influenced a number of opera productions. For example, in the Berlin production of "La damnation de Faust" (The damnation of Faust) by Hector Berlioz, Götz Friedrich as the opera's director took great liberties with the production's artistic interpretation (Figure 4). Faust, according to Goethe a physician himself, is presented here as a patient in a psychiatric ward and Mephistopheles is interpreted as the attending physician.

## **Conclusions**

A doctor appears in about 10% of the established operas. His function, importance, basis of knowledge, social status, and character in the opera clearly changes in the course of opera history (Table 2). In the 18<sup>th</sup> century, the doctor does not have a healing function but plays the buffoon as a rule and a socially rather subordinate role. He usually has a supporting role. This changes in the 19<sup>th</sup> century: He still initially appears as a miracle doctor and charlatan but at the same time already in the guise of a scientifically trained physician who acts in a more differentiated manner, albeit with the touch of the demonic in some instances. The rise of physician competence is paralleled by a rise in power with its potential to be used detrimentally. In the 20<sup>th</sup> century, the doctor often plays a major role. He usually has a superior position, or at least a high social standing and, in addition to being a clinician, he is often depicted as a researcher and partially cynically caricatured. The dynamics of the physician's role in opera history, on the one hand, reflects the development of medicine and, on the other hand, illustrates the development of the social position of doctors and the public attitude towards the medical profession over the last centuries.

## **Acknowledgements**

The support of Mr. Riesterer of Kranich-Photo, Berlin, who for many years has been photographer at the Deutsche Oper Berlin is gratefully acknowledged. Tonya Hongsermeier, Boston, and Peter Schmiedebach, Hamburg, provided valuable and insightful comments.

## References

1. Ackerknecht EH. Geschichte der Medizin (Enke Verlag, Stuttgart, 1979).
2. Lederman RJ. "Performing arts medicine," N Engl J Med. 1989;320:246-248.
3. Worth Estes J. "The changing role of the physician in opera," The Opera Quarterly, 1994; 10,2:143-155.
4. Titzmann M. Strukturelle Textanalyse (UTB Wilhelm Fink Verlag, München 1977).
5. Wörner KH. Geschichte der Musik (6. ed.) (Vandenhoeck und Ruprecht, Göttingen 1975).
6. Sadie S (ed.). The new Grove dictionary of opera (Maximilian Press, London 1992).
7. Friedell E. Kulturgeschichte der Neuzeit. Die Krise der europäischen Seele von der schwarzen Pest bis zum 1. Weltkrieg (Beck, München 1979).
8. Van Dülmen R. Kultur und Alltag in der Frühen Neuzeit (2. Vol.) (München 1992).
9. Volrad Deneke JF. Arzt und Medizin in der Tagespublizistik des 17. und 18. Jahrhunderts (Köln, Berlin 1969).
10. Fielding JF. "Myth, medicine, and music," Irish J Med Sci. 1990;159:77.
11. Carmody J. "Doctors and opera," Med J Austr. 1991;155:783-784.
12. Urdang G. Der Apotheker im Spiegel der Literatur (Berlin 1921).
13. Berendes J. Das Apothekerwesen. Seine Entstehung und geschichtliche Entwicklung bis zum 20. Jahrhundert (Stuttgart 1907).
14. Baas HJ. Die geschichtliche Entwicklung des ärztlichen Standes und der medizinischen Wissenschaften (Berlin 1986).
15. Kümmel WF. Musik und Medizin (Karl Alber Verlag, Freiburg/München 1977).
16. Ober WB. "Operatic 'doctors'," Practitioner. 1976;216:110-116.
17. Goldovsky B. "Some medical matters in operatic literature," Clevel Clin Q. 1986;53:39-43.
18. Bedford DE. "The ancient art of feeling the pulse," Br. Heart J. 1951. 13:423-437.

19. Dauber LG. "Death in opera: a case study, 'Tales of Hoffmann', Antonia," Am J Cardiol. 1992;70:832-840.
20. Chesler E, King RA, Edwards JE. "The myxomatous mitral valve and sudden death," Circulation. 1983;67:632-639.
21. Malbeck ES. Ärzte, Krankheiten, Pharmaka. Die Verwendung medizinischer Elemente im italienischen, französischen und deutschen Opernlibretto des 19. Jahrhunderts (Dissertation Düsseldorf 1971).
22. Boudalas H, Reynolds JC, Mazzaferri E, Wooley CF. "Metabolic studies in mitral valve prolapse syndrome: a neuroendocrine-cardiovascular process," Circulation. 1980;61:1200-1205.
23. Willich SN, Maclure M, Mittleman M, Arntz HR, Muller JE. "Sudden cardiac death: support for a role of triggering in causation," Circulation. 1993;87:1442-1450.
24. Louis EK. "The physician in contemporary opera: three divergent approaches to the doctor-patient relationship," Pharos, 1992;55:15-20.
25. Büchner G. Sämtliche Werke und Briefe (ed. Lehmann, Carl Hanser Verlag, München 1974).
26. Klasen EM. Die Diskussion über eine "Krise" der Medizin in Deutschland zwischen 1925 und 1935 (Dissertation Mainz 1984).
27. Schmiedebach HP. Der wahre Arzt und das Wunder der Heilkunde. Erwin Lieks ärztlich-heilkundliche Ganzheitsideen. In: Der ganze Mensch und die Medizin (Argument-Sonderband AS 162, Hamburg, 1989; pp. 33-53).



## Legends

Fig. 1 From “L’Elisir d’Amore” (the Love Potion), Gaetano Donizetti.

Dr. Dulcamara: Rolando Panerai, Nemorino: Luciano Pavarotti.

Production: John Copley, Deutsche Oper Berlin.

Copyright Kranich-Photo, Berlin, with kind permission.

Fig. 2 From “La Traviata”, Guiseppe Verdi.

Doctor Grenvil: Ivan Sardi, Violetta: Julia Varady.

Production: Gustav Rudolf Sellner, Deutsche Oper Berlin.

Copyright Kranich-Photo, Berlin, with kind permission.

Fig. 3 From “Wozzeck”, Alban Berg.

Wozzeck: Lenus Carlson, Doctor: Frido Meyer-Wolf.

Production: Otto Schenk, Deutsche Oper Berlin.

Copyright Kranich-Photo, Berlin, with kind permssion.

Fig. 4 From “La Damnation de Faust”(The Damnation of Faust), Hector Berlioz.

Faust: Kenneth Riegel, Mephistopheles: José van Dam.

Production: Götz Friedrich, Deutsche Oper Berlin.

Copyright Kranich-Photo, Berlin, with kind permission.

**Table 1: Important Operas with Physicians**

| <b>Composer</b>   | <b>Title</b>                                                    | <b>Premiere<br/>(year and city)</b> | <b>Physician</b>                 |
|-------------------|-----------------------------------------------------------------|-------------------------------------|----------------------------------|
| Haydn J           | Il mondo della luna<br>(The world of the moon)                  | 1777 Eisenstadt                     | Doctor from Bologna,<br>Baritone |
| Mozart WA         | Le nozze di Figaro<br>(The marriage of Figaro)                  | 1786 Vienna                         | Doctor Bartolo, Bass             |
| v. Dittersdorf CD | Doktor und Apotheker<br>(Doctor and pharmacist)                 | 1786 Vienna                         | Doctor Krautmann,<br>Bass        |
| Mozart WA         | Così fan tutte<br>(Women are like that)                         | 1790 Vienna                         | Despina (disguised),<br>Soprano  |
| Gyrowetz A        | Der Augenarzt<br>(The ophthalmologist)                          | 1811 Vienna                         | Berg, Tenor                      |
| Rossini G         | Der Barbier von Sevilla<br>(The barber of Seville)              | 1816 Rome                           | Doctor Bartolo, Bass             |
| Spohr L           | Pietro von Abano                                                | 1827 Kassel                         | Pietro, Baritone                 |
| Donizetti G       | L'élisir d'amore (The love potion)                              | 1832 Milano                         | Doctor Dulcamara, Bass           |
| Donizetti G       | Don Pasquale                                                    | 1843 Paris                          | Doctor Malatesta,<br>Baritone    |
| Lortzing A        | Der Waffenschmied<br>(The armourer)                             | 1846 Vienna                         | Hans Stadinger, Bass             |
| Berlioz H         | La damnation de Faust<br>(The damnation of Faust)               | 1846 Paris                          | Faust, Tenor                     |
| Verdi G           | Macbeth                                                         | 1847 Florence                       | Physician, Bass                  |
| Nicolai O         | Die lustigen Weiber von Windsor<br>(The merry wives of Windsor) | 18849 Berlin                        | Doctor Cajus, Bass               |
| Verdi G           | La Traviata                                                     | 1853 Venice                         | Doctor Grenvil, Bass             |
| Verdi G           | Les vêpres siciliennes                                          | 1855 Paris                          | Procida, Bass                    |
| Cornelius P       | Der Barbier von Bagdad<br>(The barber of Bagdad)                | 1858 Weimar                         | Abul Hassan Ali Ebn Bekar, Bass  |
| Gounod C          | Margarete                                                       | 1859 Paris                          | Faust, Tenor                     |
| Verdi             | La forza del destino<br>(The power of destiny)                  | 1862 Petersburg                     | Chirurgus, Tenor                 |
| Boito A           | Mefistofeles                                                    | 1868 Milano                         | Faust, Tenor                     |
| Offenbach J       | Les contes d'Hoffmann<br>(Tales of Hoffmann)                    | 1881 Paris                          | Doctor Miracle, Bass             |
| Reinecke C        | Gouverneur von Tours<br>(Governor of Tours)                     | 1891 Schwerin                       | Doctor Marteau, Bass             |
| Kienzl W          | Heilmар der Narr<br>(Heilmар the fool)                          | 1892 München                        | Heimar, Baritone                 |
| Verdi G           | Falstaff                                                        | 1893 Milano                         | Doctor Cajus, Tenor              |
| Pfitzner H        | Der arme Heinrich<br>(Poor Heinrich)                            | 1895 Mainz                          | Physician, Bass                  |
| Debussy C         | Pelléas et Mélisande                                            | 1902 Paris                          | Physician, Bass                  |
| Strauss R         | Der Rosenkavalier                                               | 1911 Dresden                        | Physician, Super                 |

|              |                                                                        |                                                    |                                 |
|--------------|------------------------------------------------------------------------|----------------------------------------------------|---------------------------------|
|              | (The knight of the rose)                                               |                                                    |                                 |
| Puccini G    | Gianni Schicci                                                         | 1918 New York                                      | Spinelloccio, Bass              |
| Prokofiev SS | Lyobor k tryem<br>apelsinam (The love of<br>the three oranges)         | 1921 Chicago                                       | 3 Physicians, Tenor and<br>Bass |
| Berg A       | Wozzeck                                                                | 1925 Berlin                                        | Doctor, Bass                    |
| Gurlitt M    | Wozzeck                                                                | 196 Bremen                                         | Doctor, Bass                    |
| Gershwin G   | Porgy and Bess                                                         | 1935 New York                                      | Doctor Archdale                 |
| Berg A       | Lulu                                                                   | 1937 Zürich                                        | Medizinalrat Speaking<br>Role   |
| Prokofiev SS | L'ange de feu (The fiery<br>angel)                                     | 1955 Venice (partial<br>performance 1928<br>Paris) | Physician, Baritone             |
| Poulenc F    | Les dialogue des<br>Carmélites (The<br>dialogues of the<br>Carmelites) | 1957 Milano                                        | Javelinot, Baritone             |
| Henze HW     | Elegie für junge<br>Liebende (Elegy for<br>young lovers)               | 1961 Schwetzingen                                  | Doctor Reischmann,<br>Bass      |
| Heinze HW    | Ein Landarzt (A country<br>doctor)                                     | 1965 Frankfurt                                     | Landarzt, Baritone              |
| Henze HW     | Wir erreichen den Fluß<br>(We come to the river)                       | 1976 London                                        | Physician, Baritone             |
| Debussy C    | La chute de la maison<br>Usher (The fall of the<br>house Usher)        | 1977 New Haven                                     | Physician, Baritone             |
| Nyman M      | The man who mistook<br>his wife for a hat                              | 1986 London                                        | Doctor S, Baritone              |

**Table 2: The changing appearance of the physician in opera history**

| Century          | Role           | Character       | Role as Physician         | Basis of Knowledge       | Social Position* |
|------------------|----------------|-----------------|---------------------------|--------------------------|------------------|
| 18 <sup>th</sup> | minor          | comic           | none                      | quack                    | inferior         |
| 19 <sup>th</sup> | minor<br>major | comic<br>tragic | clinical work             | magic potion<br>physical | equal            |
| 20 <sup>th</sup> | major          | epic            | clinical work<br>research | rational<br>biological   | superior         |

\* in the context of the plot

**Libretto Excerpt 1: Le nozze di Figaro (The marriage of Figaro), Mozart WA, 1786 (Da Ponte L, translated Salter L)**

Act 1, No. 4, Aria (D major) Doctor Bartolo

La vendetta, oh, la vendetta  
è un piacer serbato ai saggi  
L'obbliar l'onte, gli oltraggi è bassezza,  
è ognor viltà.

.....

Tutta Sevilla conosce Bartolo, il birbo Figaro  
vinto sarà.

Revenge, yes, revenge  
Is a pleasure meant for the intelligent  
to forget insults and outrages  
is always low and base

.....

All Seville knows Dr. Bartolo,  
that rascal Figaro will lose the day.

**Libretto Excerpt 2: Doktor und Apotheker (Doctor and Pharmacist), v. Dittersdorf CD, 1786** (Stephani dj, translated Willich SN)

a) Act 2, from Scene 1, Aria (C major) Doctor Krautmann

Ein Doktor ist bei meiner Ehr'  
der größte Mann im Staate!  
Denn wer nützt außer ihm wohl mehr?  
Selbst keiner aus dem Rate.  
Denn diese können weiter nichts, als  
projektieren, konsultieren, referieren,  
kontrollieren, kondemnieren, exequieren...

A doctor is certainly  
the greatest man in the state!  
Because, who is more useful  
than him?  
Even nobody of the Council. Ignorant!  
Because these cannot do anything except  
planning, consulting, reporting, controlling,  
condemning, carrying out...

b) Act 2, from Scene 17, Duett (E minor), Doctor Krautmann, Pharmacist Stößel

K: Sie sind ein Scharlatan, ein Ignorant  
S: Ich bin ein weiser Mann, ein Laborant!  
K: Ein Schrecken für Gesunde, ein Doktor  
für die Hunde  
S: Das spricht der Neid aus Ihnen,  
es zeigens Ihre Mienen.  
Beide: Doch Sie bekommen schon Ihren  
Lohn. In Ihrem Sohn räch' ich mich schon...  
Verdammter Scharlatan! Nun halt ich mich  
nicht mehr. Ich bei meiner Ehr Dir schon  
das Handwerk legen, Du sollst Dich nicht  
mehr regen. zu Boden Ignorant. Du Pillen  
Fabrikant! Rezepten Fabrikant!

You are a charlatan, an ignorant!  
I am a wise man, a laboratory worker!  
A tenor for the healthy, a doctor for dogs  
You are just envious  
as shown by your expression.  
Both: You will get what you deserve. I take  
revenge in your son...  
Damned charlatan! I won't hold back any  
longer. I swear to stop your job, you won't  
move any longer. Get down, ignorant. You pill  
manufacturer! Recipe manufacturer!

**Libretto Excerpt 3: L'elisir d'amore (The love potion), Donizetti G, 1832** (Romani F, translated Cochrane P, Chalmers K)

a) Act 1, Scene 5, from Cavatina (A major) Doctor Dulcamara

|                                                                                                                                                                                                                                                                                                                                                                                                                                                                                                                                                                                                                                                                                                                                         |                                                                                                                                                                                                                                                                                                                                                                                                                                                                                                                                                                                                                                                                                                                                                                                   |
|-----------------------------------------------------------------------------------------------------------------------------------------------------------------------------------------------------------------------------------------------------------------------------------------------------------------------------------------------------------------------------------------------------------------------------------------------------------------------------------------------------------------------------------------------------------------------------------------------------------------------------------------------------------------------------------------------------------------------------------------|-----------------------------------------------------------------------------------------------------------------------------------------------------------------------------------------------------------------------------------------------------------------------------------------------------------------------------------------------------------------------------------------------------------------------------------------------------------------------------------------------------------------------------------------------------------------------------------------------------------------------------------------------------------------------------------------------------------------------------------------------------------------------------------|
| <p>Ei move i paralitici<br/>         Spedisce gli apopletici,<br/>         gli jasmatici, gli asfitici<br/>         gl'isterici, i diabetici<br/>         guarisce timpanitidi,<br/>         e scrofole e rachitidi<br/>         e fino il mal di fegato<br/>         che in moda diventó.<br/>         Mirabile pe' cimici<br/>         Mirabile pel fegato<br/>         guarisce i paralitici<br/>         spedisce gli apopletici.<br/>         Comprate il mio specifico<br/>         Voi, vedove e donzelle<br/>         voi, giovani galanti<br/>         per poco ve lo dò.<br/>         Avanti, avanti, vedove,<br/>         avanti, avanti, bamboli<br/>         Comprate il mio specifico<br/>         per poco ve lo dó.</p> | <p>It moves paralytics<br/>         is effective with apopletics<br/>         asthmatics, asphitics<br/>         hysterics, diabetics,<br/>         it cures earache,<br/>         scrofula and rickets,<br/>         and even liver disease<br/>         which has become so fashionable.<br/>         Wonderful with bugs<br/>         wonderful for the liver<br/>         it cures paralytics,<br/>         is effective with apoplectics.<br/>         Buy my specific, you widows and young girls<br/>         you, young gallants,<br/>         I'll let you have it for almost nothing.<br/>         Come up, come up, widows<br/>         Come up, come up, children<br/>         buy my specific<br/>         I'll let you have it<br/>         for almost nothing.</p> |
|-----------------------------------------------------------------------------------------------------------------------------------------------------------------------------------------------------------------------------------------------------------------------------------------------------------------------------------------------------------------------------------------------------------------------------------------------------------------------------------------------------------------------------------------------------------------------------------------------------------------------------------------------------------------------------------------------------------------------------------------|-----------------------------------------------------------------------------------------------------------------------------------------------------------------------------------------------------------------------------------------------------------------------------------------------------------------------------------------------------------------------------------------------------------------------------------------------------------------------------------------------------------------------------------------------------------------------------------------------------------------------------------------------------------------------------------------------------------------------------------------------------------------------------------|

b) Act 2, Final Scene, from Recitativo (C major) Doctor Dulcamara, Nemorino, Adina, Gianetta, Chorus

|                                                                                                                                                                                                                                                                          |                                                                                                                                                                                                                                                              |
|--------------------------------------------------------------------------------------------------------------------------------------------------------------------------------------------------------------------------------------------------------------------------|--------------------------------------------------------------------------------------------------------------------------------------------------------------------------------------------------------------------------------------------------------------|
| <p>N: Caro dottor,<br/>         felice io son per voi</p>                                                                                                                                                                                                                | <p>Dear Doctor,<br/>         you have made me happy</p>                                                                                                                                                                                                      |
| <p>C: Per lui?</p>                                                                                                                                                                                                                                                       | <p>He has?</p>                                                                                                                                                                                                                                               |
| <p>D: Per me. Sappiate che Nemorino è diventato a un<br/>         tratto i più ricco castaldo del villaggio,<br/>         Poiché morte è lo zio.</p>                                                                                                                     | <p>I have. You must know that<br/>         Nemorino has suddenly become the<br/>         richest farmer in the village, since<br/>         his uncle has died?</p>                                                                                           |
| <p>A+ N: Morto lo zio?</p>                                                                                                                                                                                                                                               | <p>His uncle has died?</p>                                                                                                                                                                                                                                   |
| <p>G: Io Io sapevo</p>                                                                                                                                                                                                                                                   | <p>I knew it.</p>                                                                                                                                                                                                                                            |
| <p>D: Lo sapevo anch'io.<br/>         Ma quel che non sapete.<br/>         Nè potreste sapere,<br/>         egli é che questo sormumano<br/>         elisir può in momento, non solo remediar al mal<br/>         di amore,<br/>         ma arricchir gli spiantati.</p> | <p>I knew it as well.<br/>         But what you don't know<br/>         nor could know,<br/>         is that this superhuman elixir<br/>         can, in a moment, not only<br/>         cure the ills of love<br/>         but make the penniless rich.</p> |
| <p>C: Oh, Il gran liquore!</p>                                                                                                                                                                                                                                           | <p>Oh, The wonderful drink.</p>                                                                                                                                                                                                                              |

**Libretto Excerpt 4: La Traviata, Verdi G, 1853** (Piave FM, translated Polydor)

Act 3, from Final Scene (E major, D flat major), Violetta, Doctor Grenvil, Alfredo, Germont, Annina

V: Se una pudica vergine  
Degli anni suoi sul fiore  
A te donasse il core  
Sposa ti sia....lo vò  
Le porgi quest'effigie  
Dille che dono ell'è  
Di chi nel ciel fra gli angeli  
Prega per lei, per te.

D, A, G, A:  
Finchè avra' il ciglio lagrime  
lo piangerò per te  
Vola a beati spiriti  
Iddio ti chiama sè.

If some gentle maiden  
In the springtime of her life  
Should give to you her heart  
Let her be your wife  
For such is my wish  
Give her this picture  
And tell her it's a gift  
Of one who's from heaven  
amongst the angles  
Pray always for her and for you.  
As long as I have tears to shed I shall weep  
for you.  
Fly to the regions of the blessed, For God  
calls you to him!



**Libretto Excerpt 5: Les contes d'Hoffmann (Tales of Hoffmann), Offenbach J, 1881**  
 (Barbier J, adapted from Hoffmann ETA, translated Cochrane P, Chalmers K.)

a) Act 3, No. 21, from Trio (A flat minor, G minor) Doctor Miracle, Crespel, Hoffmann, Antonia (backstage)

|    |                                                                         |                                                      |
|----|-------------------------------------------------------------------------|------------------------------------------------------|
| M: | Quel age avez-vous, je vous prie?                                       | How old are you, please?                             |
| C: | Qui? Moi?                                                               | Who? Me?                                             |
| M: | Je parle à votre enfant.                                                | I'm speaking to your daughter.                       |
| H: | Antonia?                                                                | Antonia?                                             |
| M: | Quel age? Répondez!                                                     | How old? Answer!                                     |
|    | Je le veux! Vingt ans!                                                  | I want to know! Twenty!                              |
|    | Le printemps de la vie!                                                 | The springtime of life!                              |
|    | Voyons, voyons, la main!                                                | Come along, let's see your hand.                     |
| C: | La main?                                                                | The hand?                                            |
| M: | Chut! Laissez-moi compter.                                              | Hush! Let me count.                                  |
| H: | Dieu! Suis-je le jouet d'un rêve?                                       | Heavens! Am I the victim of a dream?                 |
|    | Est-ce un phantome?                                                     | Is it a ghost?                                       |
| M: | Le pulse est inégal et vif,<br>mauvais symptome!                        | The pulse is fast and uneven, a bad sign.            |
|    | Chantez                                                                 | Sing!                                                |
| C: | Non, non, tais-toi! Ne la fais pas chanter!                             | No, no, be quiet! Don't make her sing!               |
| M: | Chantez!                                                                | Sing!                                                |
| A: | Ah! -                                                                   | Ah! -                                                |
| M: | Voyez, son front s'anime, et son regard<br>flamboie.                    | Look how her face brightens and her<br>eyes sparkle. |
|    | Elle porte la main à son coeur agité!                                   | She is clutching the beating heart.                  |
| C: | Que dit-il?                                                             | What is he saying?                                   |
|    | Il serait dommage en verité de laisser à la mort<br>une si belle proie! | To hand such a pretty victim over to<br>death!       |

b) Act 3, No. 23, from final Scene (F major, D minor, E minor, E major) Doctor Miracle, Crespel, Hoffmann, Niklaus, Antonia

|    |                                                                                                                                                                                                                    |                                                                                                                                                                                                       |
|----|--------------------------------------------------------------------------------------------------------------------------------------------------------------------------------------------------------------------|-------------------------------------------------------------------------------------------------------------------------------------------------------------------------------------------------------|
| A: | Mon père! écoutez, c'est ma mère qui<br>m'appelle!<br>Et lui de retour!<br>C'est une chanson d'amour<br>qui s'envole triste ou folle<br>Ah! - C'est une chanson d'amour!<br>(Elle meurt)                           | Father! Listen, it is my mother calling<br>me!<br>And he has come back!<br>It is a love song<br>a soaring love song, sad and joyful<br>Ah! - it is a song of love<br>(She dies)                       |
| C: | Non! Un seul mot, ma fille, parle-moi!                                                                                                                                                                             | No! Just one word, Daughter, speak to<br>me, daughter!                                                                                                                                                |
|    | Parle donc!...Mort excécrable!<br>Non! Pitié, pitié! Grace!<br>Eloigne-toi, ma fille!<br>Hoffmann! Ah, misérable,<br>c'est toi, c'est toi qui l'as tuée.<br>Du sang pour colorer sa joue.<br>Une arme, un couteau. | Oh, speak!... Hateful death!<br>No, have pity, pity! Merci!<br>Go away! My daughter!<br>Hoffmann! Wretch!<br>You are the one who has killed her.<br>Blood! To redden her cheeks.<br>A weapon, a knife |

N: Malheureux!  
H: Vite donne l'alarme!  
Un médecin, un médecin!  
M: Présent!  
Mort!  
C: Ah, Dieu, mon enfant, ma fille!  
H: Antonia!

You wretch!  
Quick! Raise the alarm!  
A doctor, a doctor!  
Here I am!  
Dead  
Oh, God, my child, my daughter!  
Antonia

**Libretto Excerpt 6: Wozzeck, Berg A, 1925** (Adapted from Büchner G, translated DECCA)

Act 1, from Scene 4 (atonal, Passacaglia: Theme and variations), Doctor and Wozzeck

a)

D: Was erleb' ich Wozzeck? Ein Mann ein Wort? Ei, ei, ei! What's this, Wozzeck? A man of your word, are you? Dear me!

W: Was denn, Herr Doktor? What's the matter, Doctor

D: Ich hab's geseh'n, Wozzeck, Er hat wieder gehustet, gebellt wie ein Hund! Geb' ich ihm dafür alle Tage drei Groschen? Wozzeck! das ist schlecht, sehr schlecht! Oh! I saw you, Wozzeck. You were coughing again, in the street, you were coughing like a dog!

Don' I give you three Groschen every day? Wozzeck, that's bad!

The world's bad, very bad! oh!

W: Aber Herr Doktor, wenn einem die Natur kommt!

But Doctor, if nature insists!

D: Die Natur kommt! Die Natur kommt! Aberglaube, abscheulicher Aberglaube! Hab ich nicht nachgewiesen, daß das Zwerchfell dem Willen unterworfen ist. Die Natur, Wozzeck! Der Mensch ist frei! In dem Menschen verklärt sich die Individualität zur Freiheit! Husten müssen! Hat er schon seine Bohnen gegessen, Wozzeck? Nichts als Bohnen, nichts als Hülsenfrüchte! Merk er sich's! Die nächste Woche fangen wir dann mit Schöpsenfleisch an. Es gibt eine Revolution in der Wissenschaft: Eiweiß, Fette, Kohlenhydrate, und zwar Oxyaldehydanhydride...Aber, er hat wieder gehustet!

Nature insists! Nature insists! Superstition, nothing but appalling superstition! Haven't I proved that the diagnosis is subject to the exercise of the will? Nature, Wozzeck! Man is free! In man, individuality is transfigured and becomes Freedom! The idea: that it's necessary to cough! Have you eaten your beans yet, Wozzeck? Nothing but beans, nothing but legumes! Bear it in mind. Then next week we'll start with mutton. There's a reduction in science now: Protein, fats, carbohydrates, and oxyaldehydanhydrids.... Yet you are coughing again.

W: Herr Doktor. Wenn die Sonne im Mittag steht, und es ist, als ging die Welt in Feuer auf, hat schon eine fürchterliche Stimme zu mir geredet.

Doctor, when the sun is overhead at noon, and it's as though the world were bursting into flames, a terrible voice has spoken to me.

D: Wozzeck, Er hat eine Aberratio...

Wozzeck, you're suffering from aberratio

b)

W: Die Schwämme! Haben Sie schon die Ringe von den Schwämmen am Boden gesehen? Linienkreise, Figuren, wer das lesen könnte!

The toadstools! Have you ever seen rings of toadstools on the ground? Circles... figures.... Oh, to be able to read them!

D: Wozzeck, Er kommt ins Narrenhaus. Er hat eine schöne fixe Idee, eine köstliche Aberration mentalis partialis, zweite Spezies! Sehr schön ausgebildet!

Wozzeck, you'll end up in the madhouse! You have got a beautiful obsession, a splendid aberratio mentalis partialis of the second species! Highly developed!

Wozzeck, Er kriegt noch mehr Zulage! Tut Er Wozzeck, you'll get a raise! Are you

- |                                                                                                                                                                                                                              |                                                                                                                                                                                                         |
|------------------------------------------------------------------------------------------------------------------------------------------------------------------------------------------------------------------------------|---------------------------------------------------------------------------------------------------------------------------------------------------------------------------------------------------------|
| <p>noch alles wie sonst? Rasiert seinen Hauptmann? Fängt fleißig Molche? Isst seine Bohnen?</p>                                                                                                                              | <p>doing everything as before? Do you shave your captain? Are you looking lizards as you should? Are you eating your beans?</p>                                                                         |
| <p>W: Immer ordentlich, Herr Doktor; denn das Menagengeld kriegt das Weib: Darum tu' ich's ja!</p>                                                                                                                           | <p>Just as I should, doctor. So that my girl gets the extra money: that's why I do it.</p>                                                                                                              |
| <p>D: Er ist ein interessanter Fall, halt er sich nur brav! Wozzeck, Er kriegt noch einen Groschen mehr Zulage. Was muß Er aber tun?</p>                                                                                     | <p>You are an interesting case, just behave yourself! Wozzeck, you'll get a pay raise of one Groschen. But what do you have to do.</p>                                                                  |
| <p>W: Ach, Marie!</p>                                                                                                                                                                                                        | <p>Oh, Marie!</p>                                                                                                                                                                                       |
| <p>D: Bohnen essen, dann Schöpsenfleisch essen, nicht husten. Seinen Hauptmann rasieren, dazwischen die fixe Idee pflegen! Oh meine Theorie! Oh mein Ruhm! Ich werde unsterblich! Wozzeck, zeig' Er mir jetzt die Zunge!</p> | <p>Eat your beans, then some mutton, don't cough. Shave your captain, and go on looking after your obsession! Oh my hypothesis! Oh! my fame! I shall be immortal! Wozzeck, show me your tongue now!</p> |

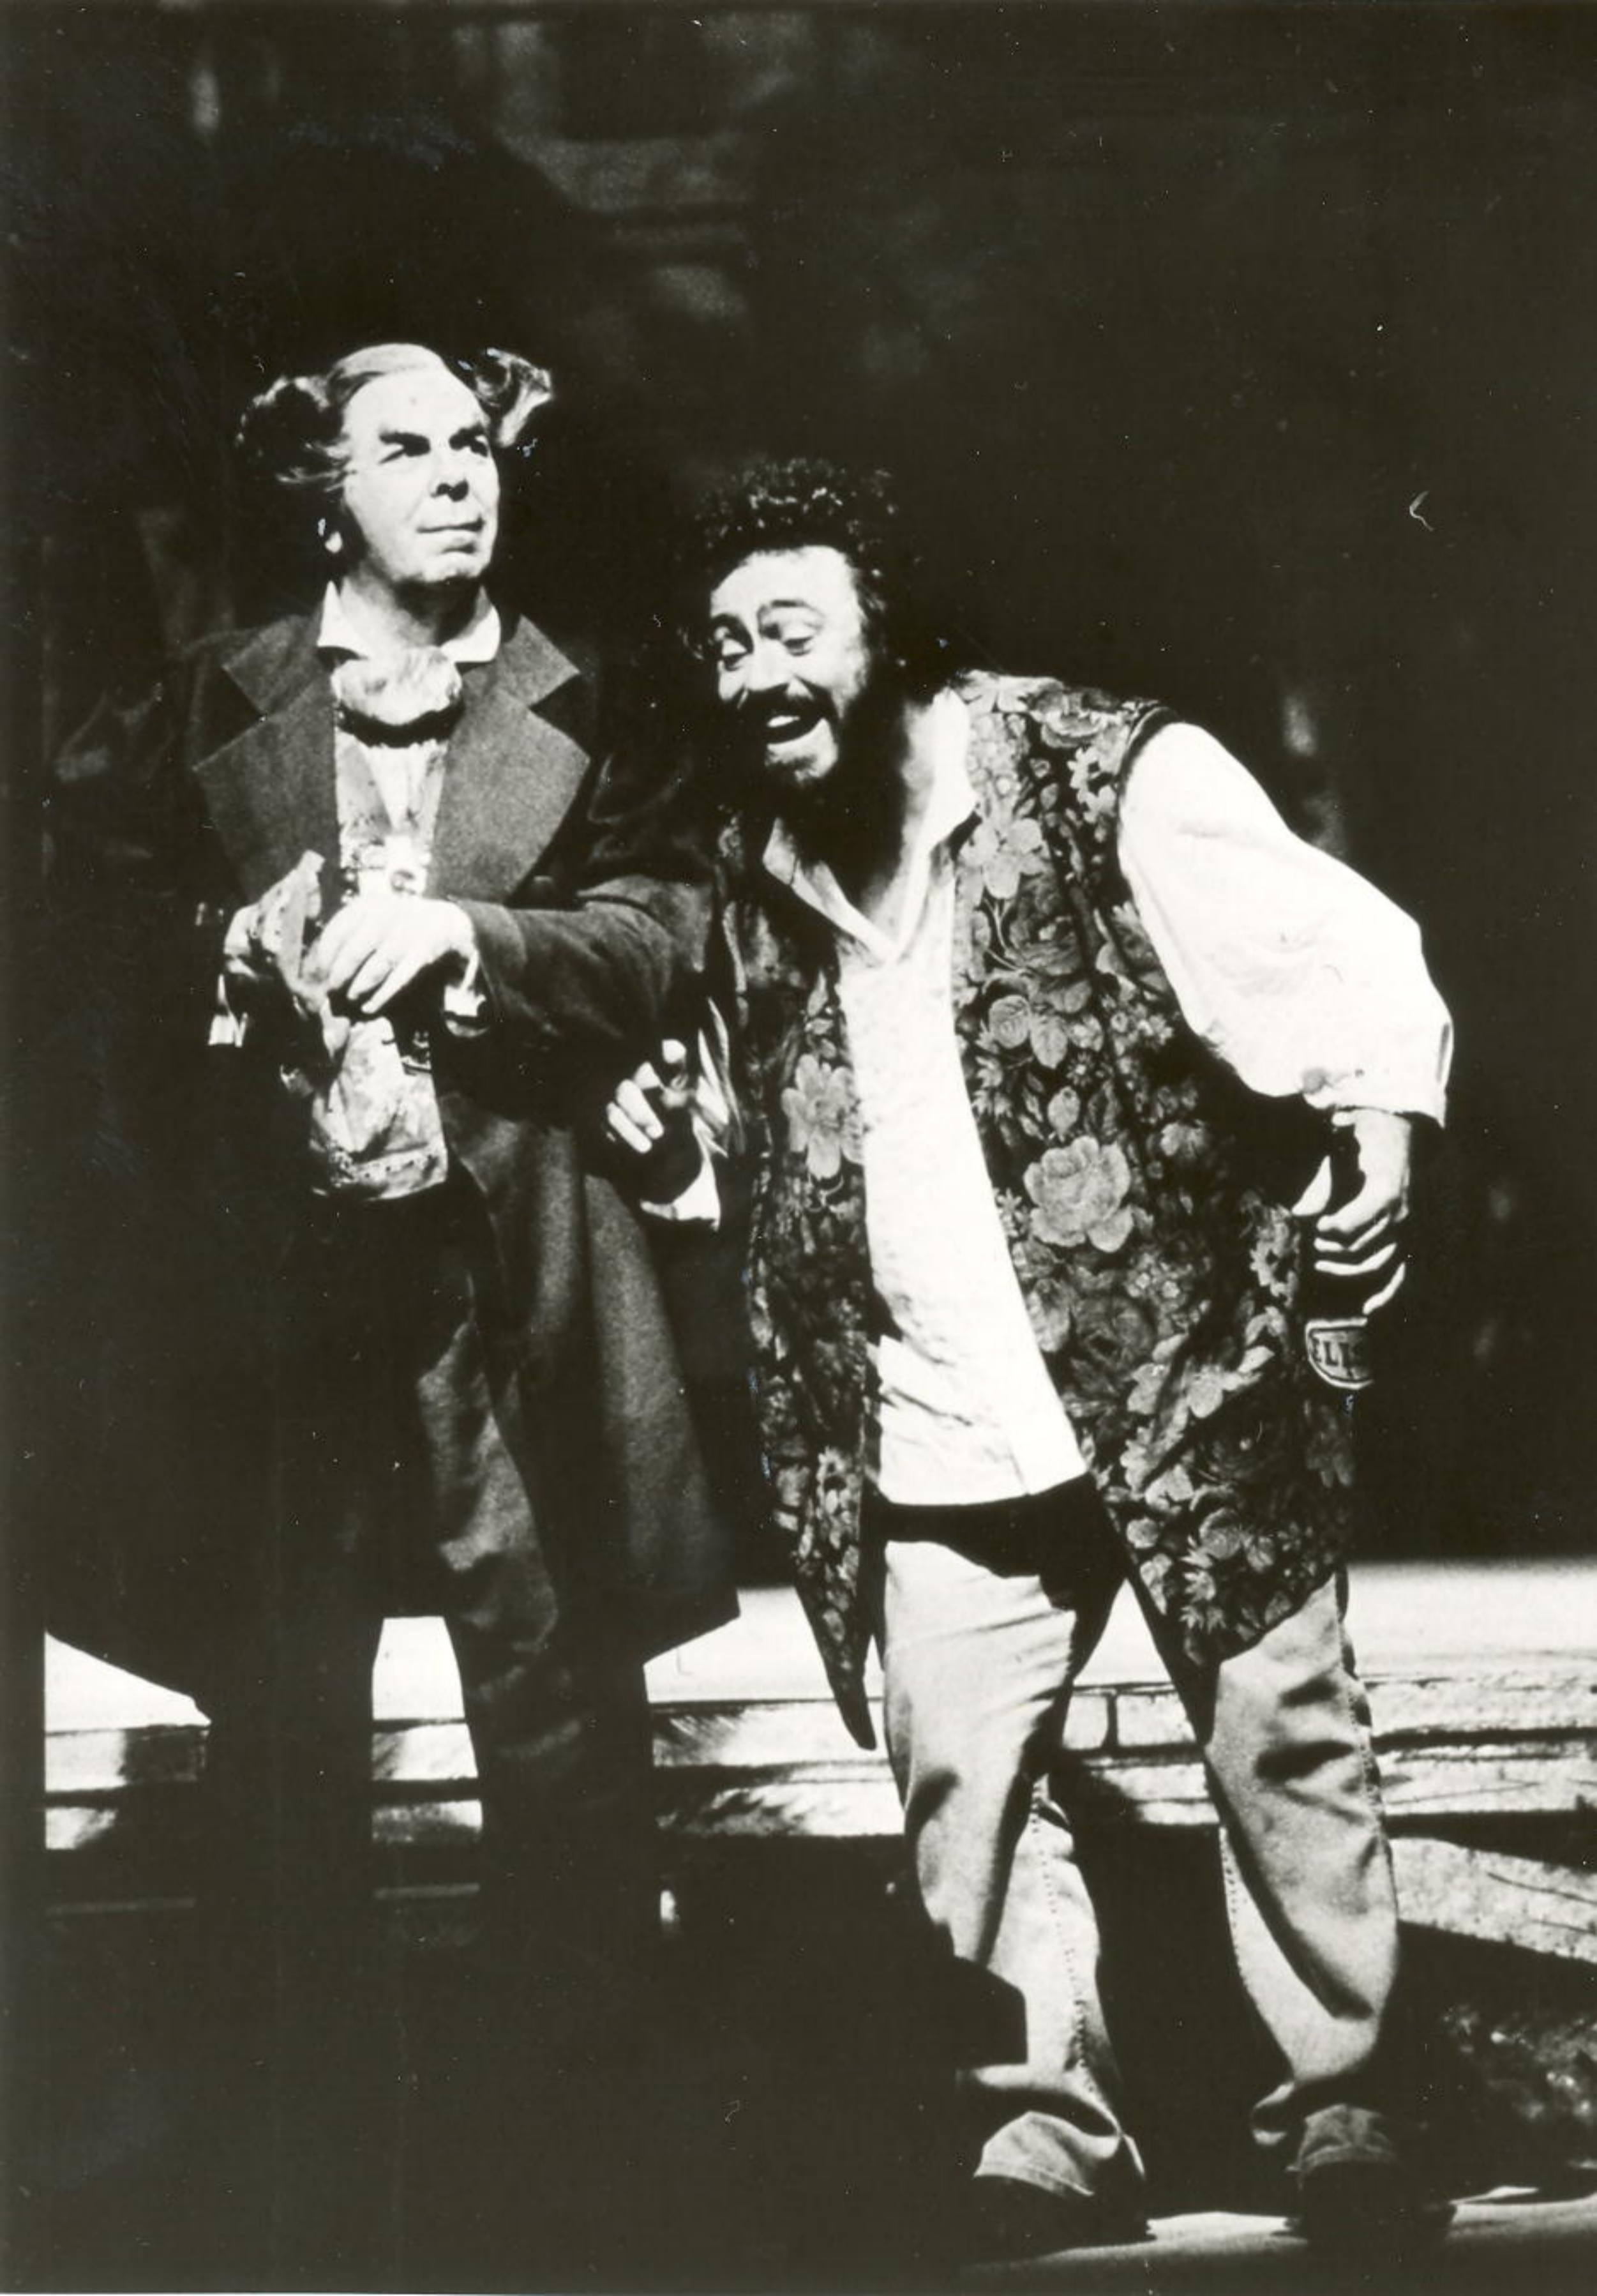



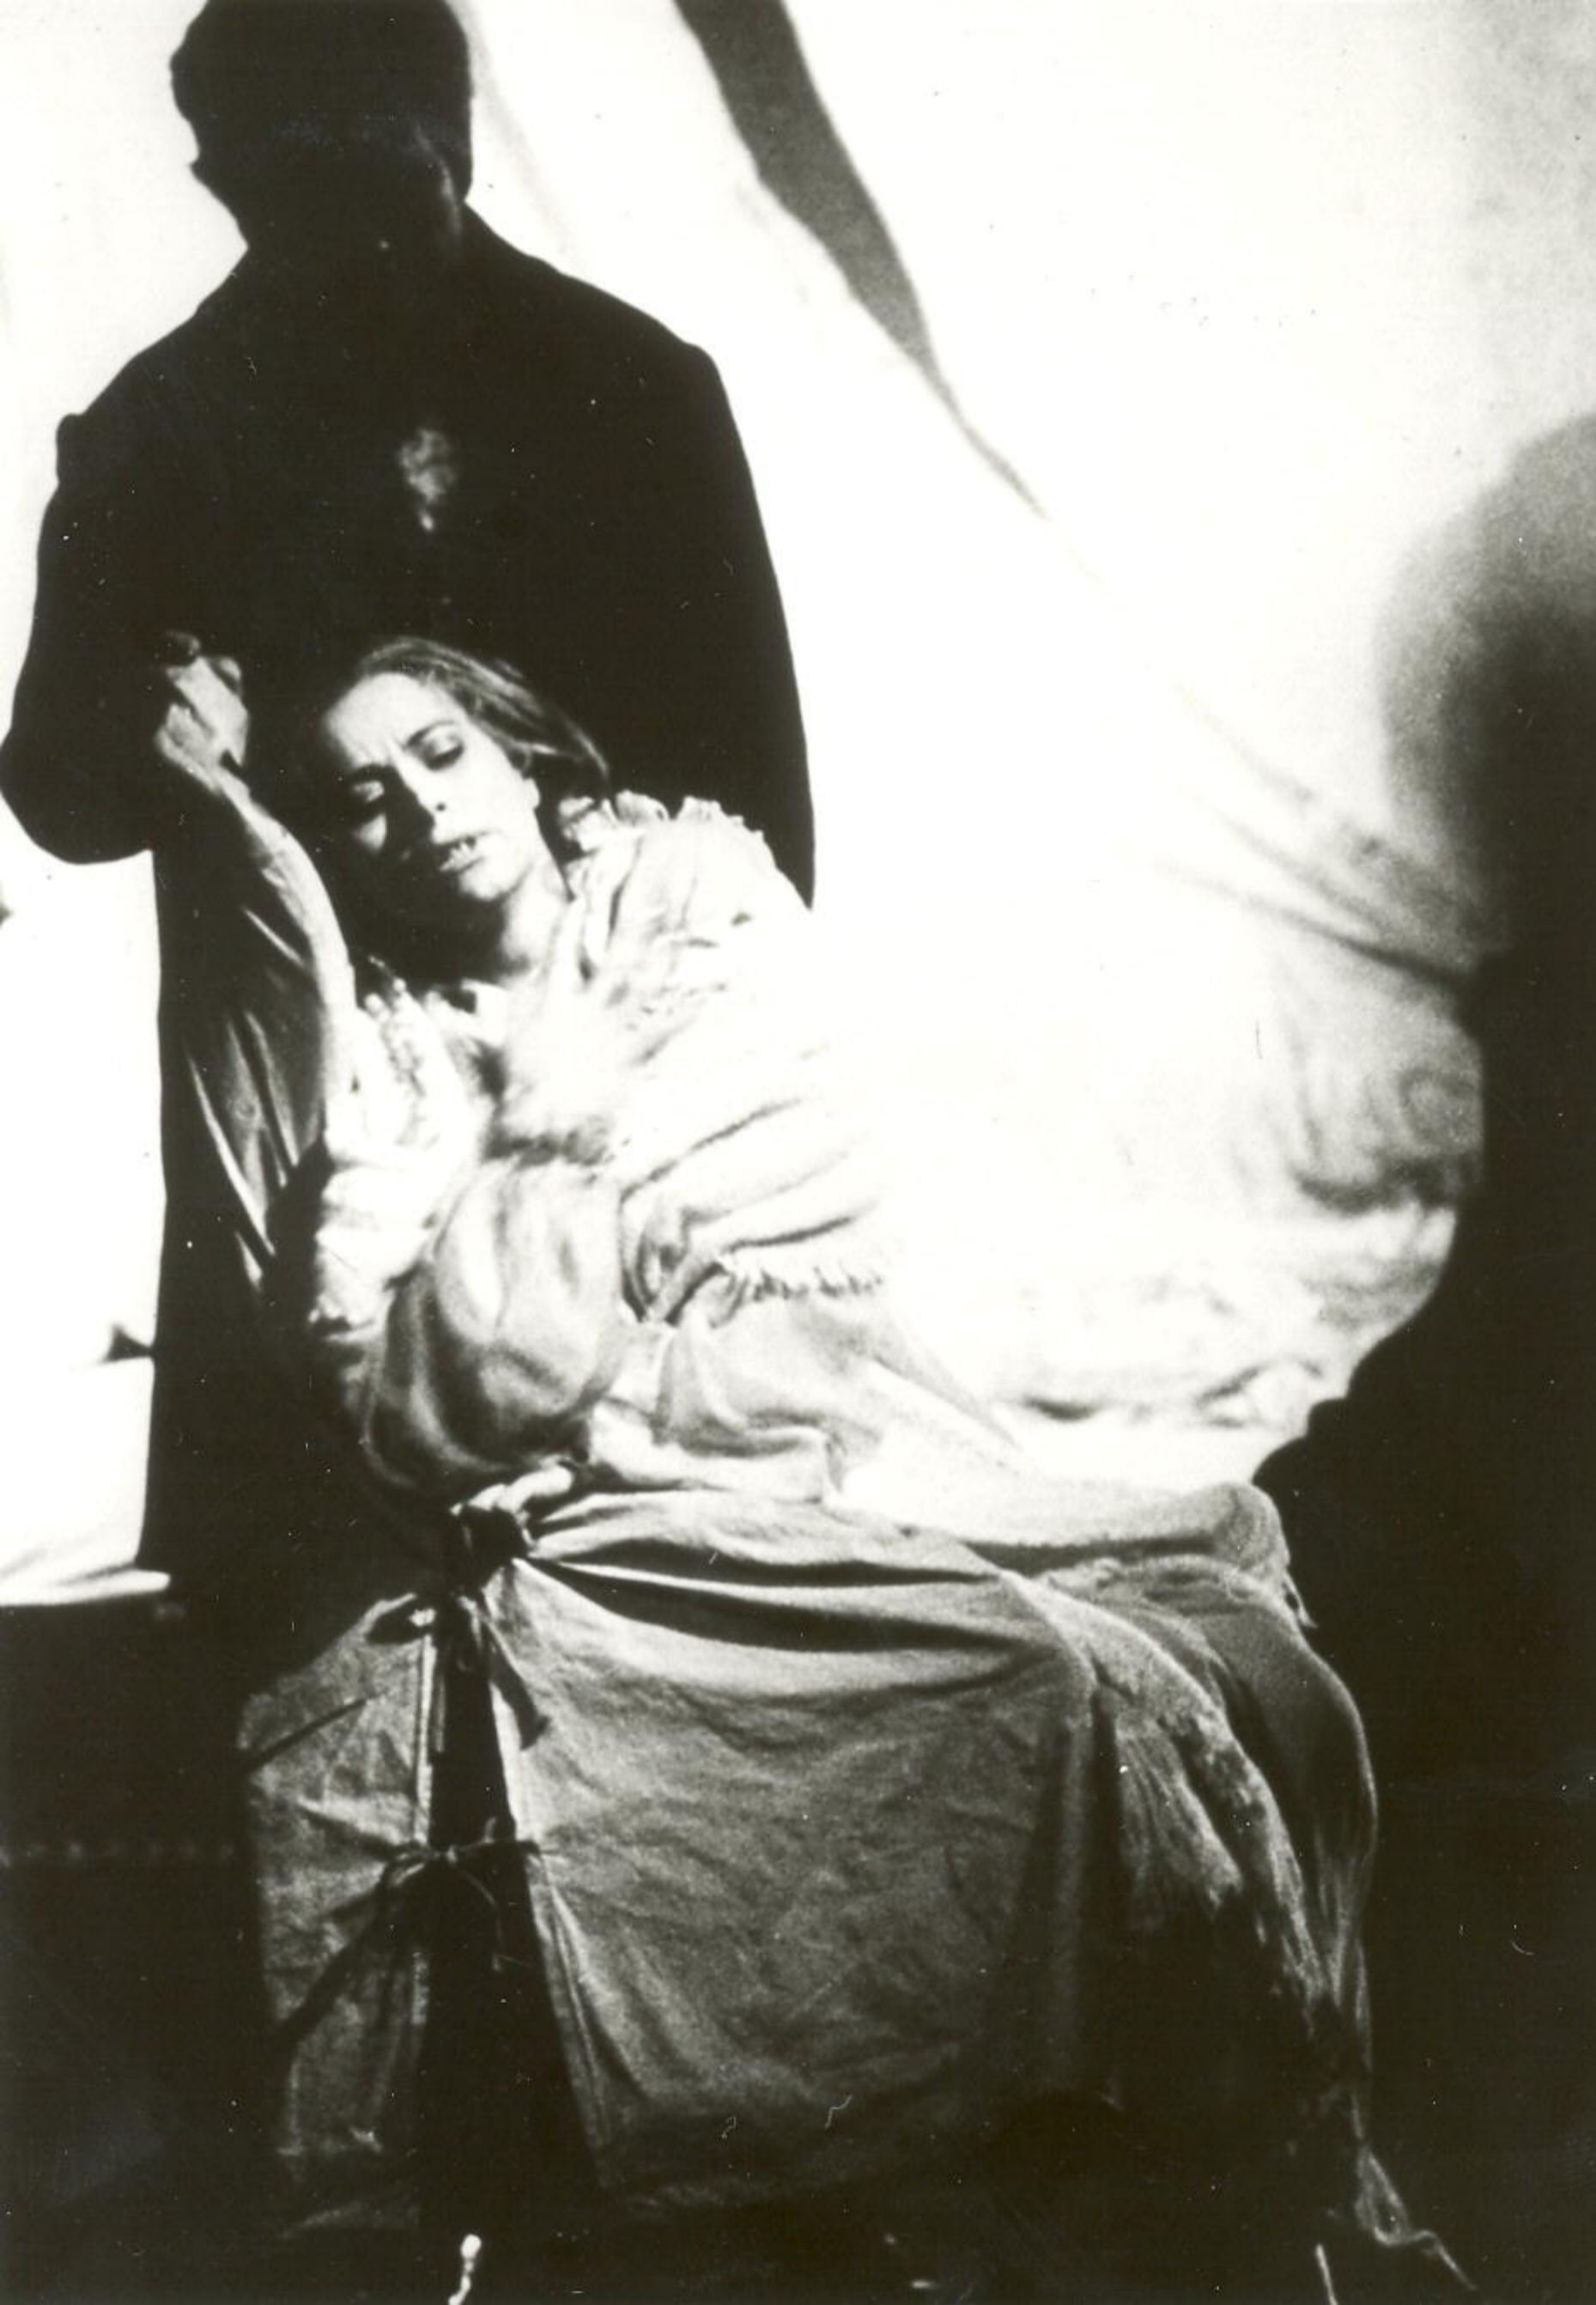

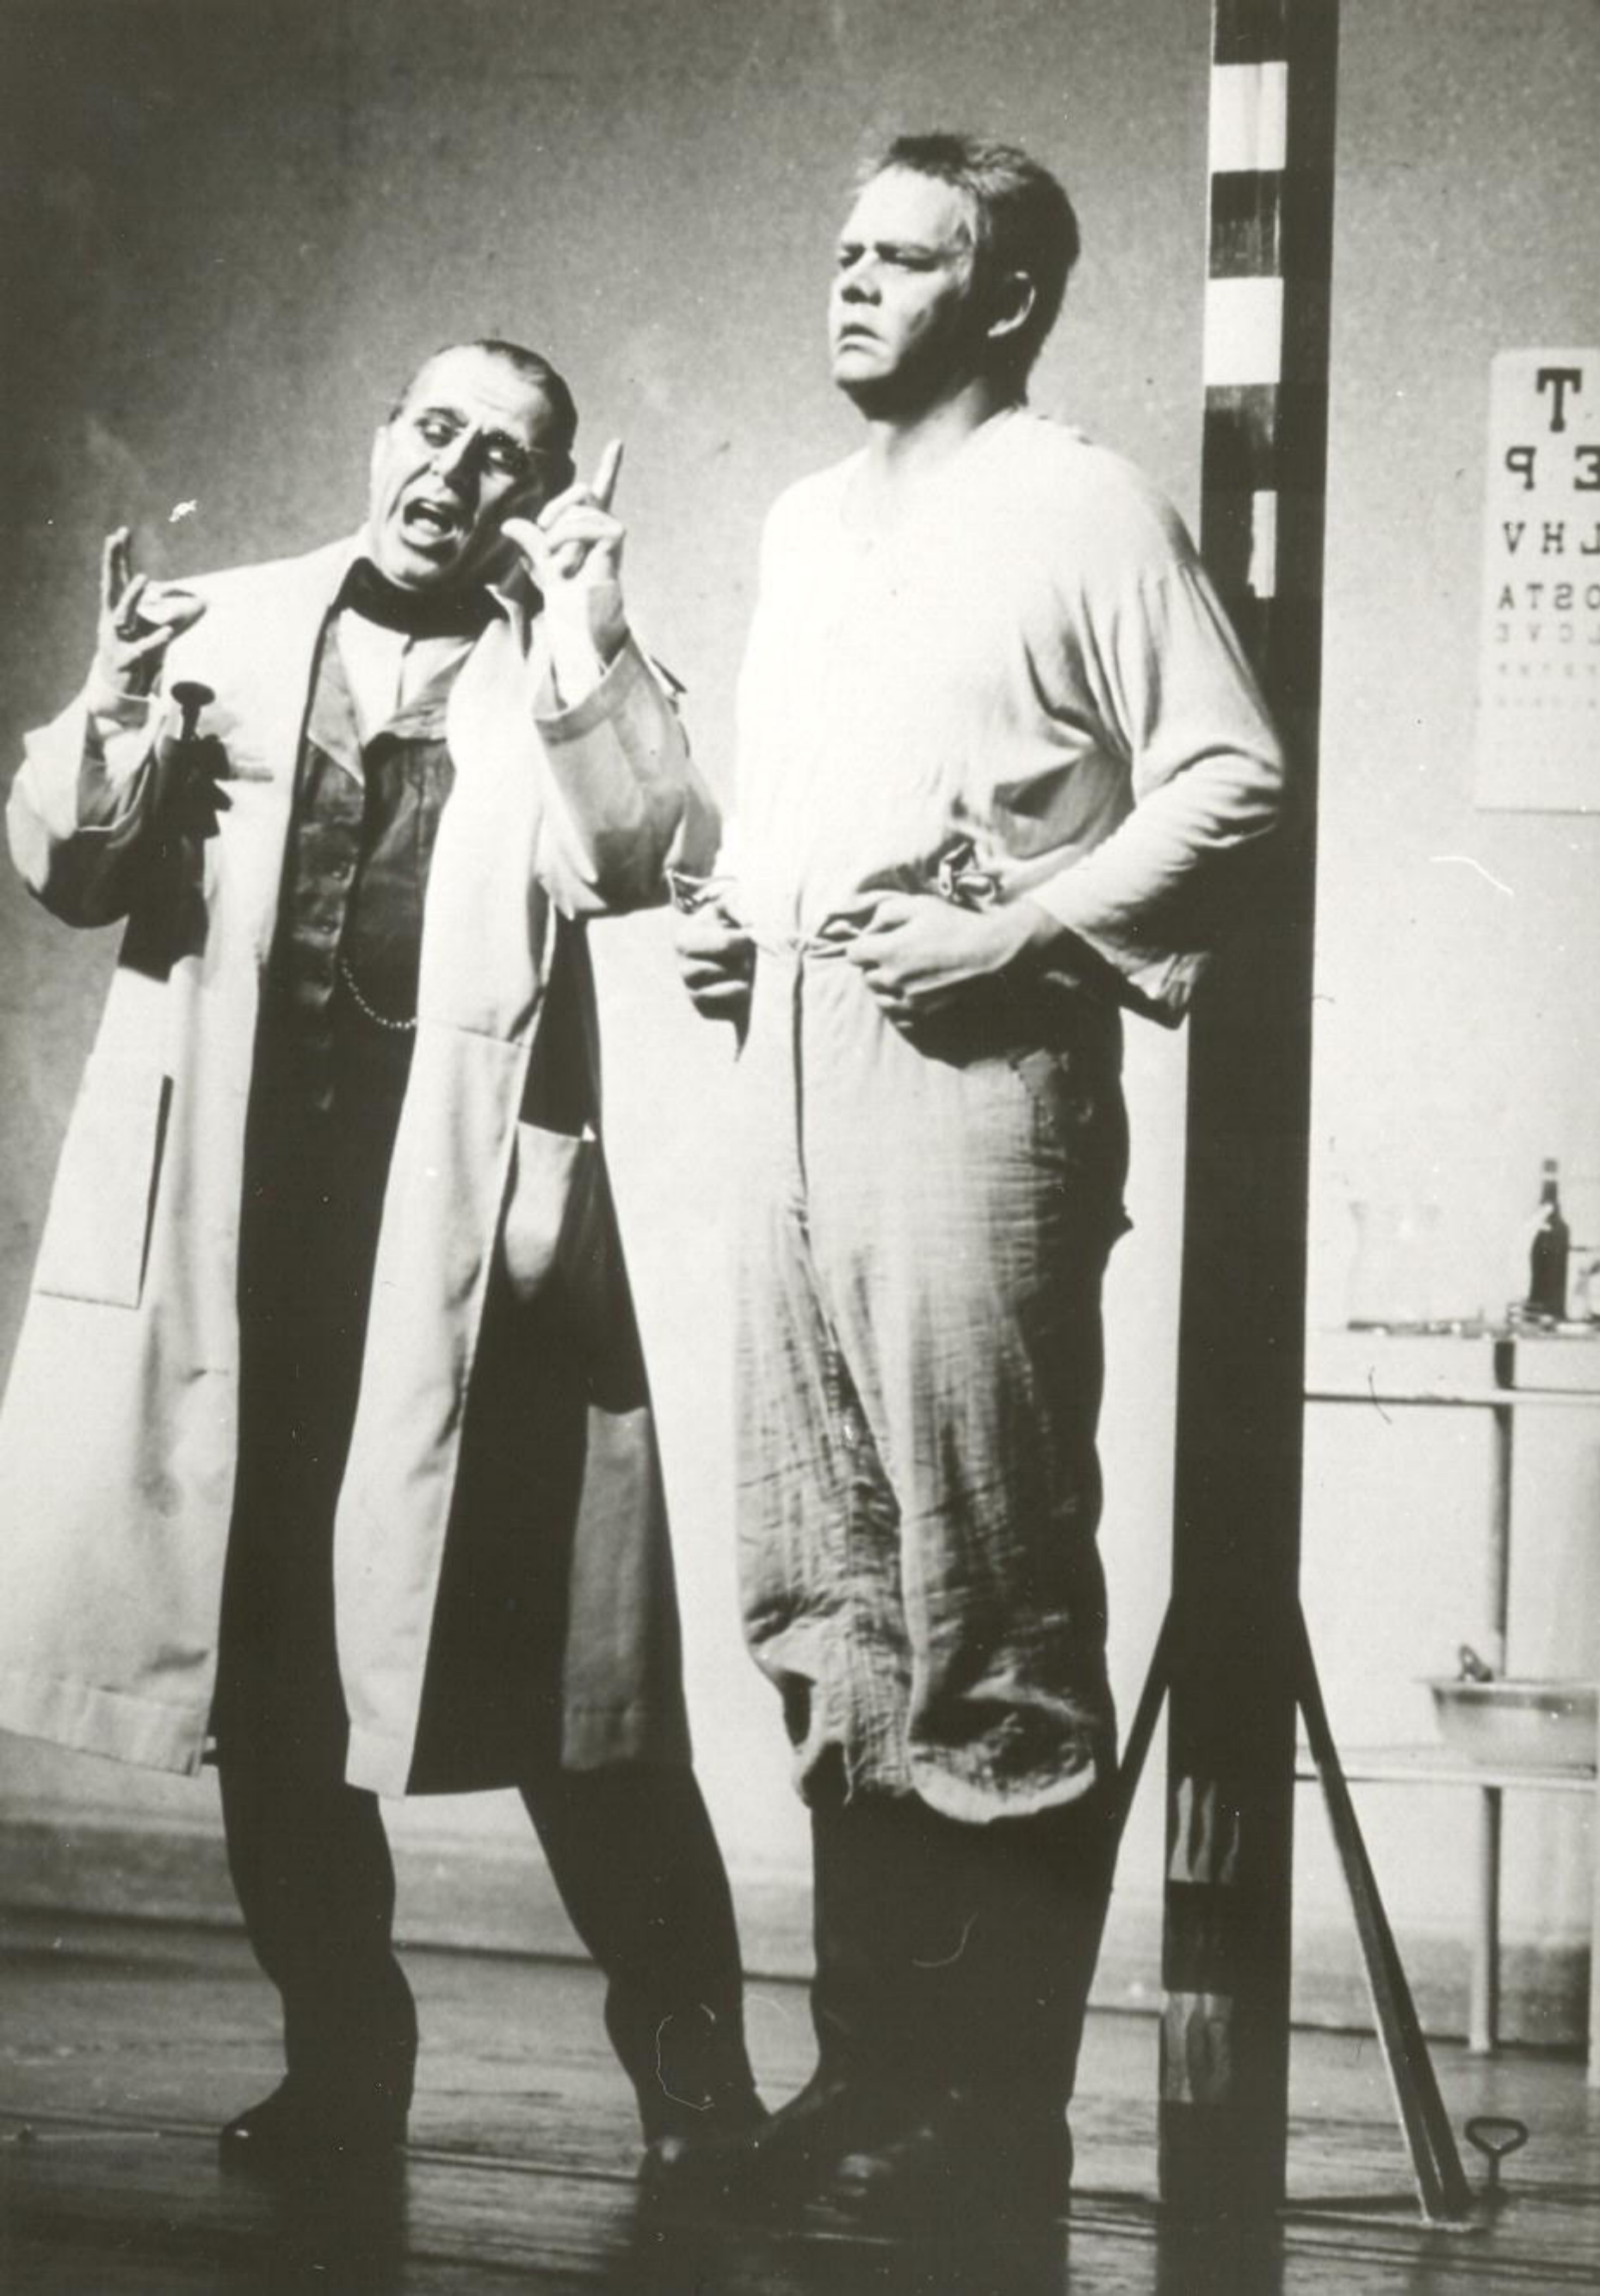



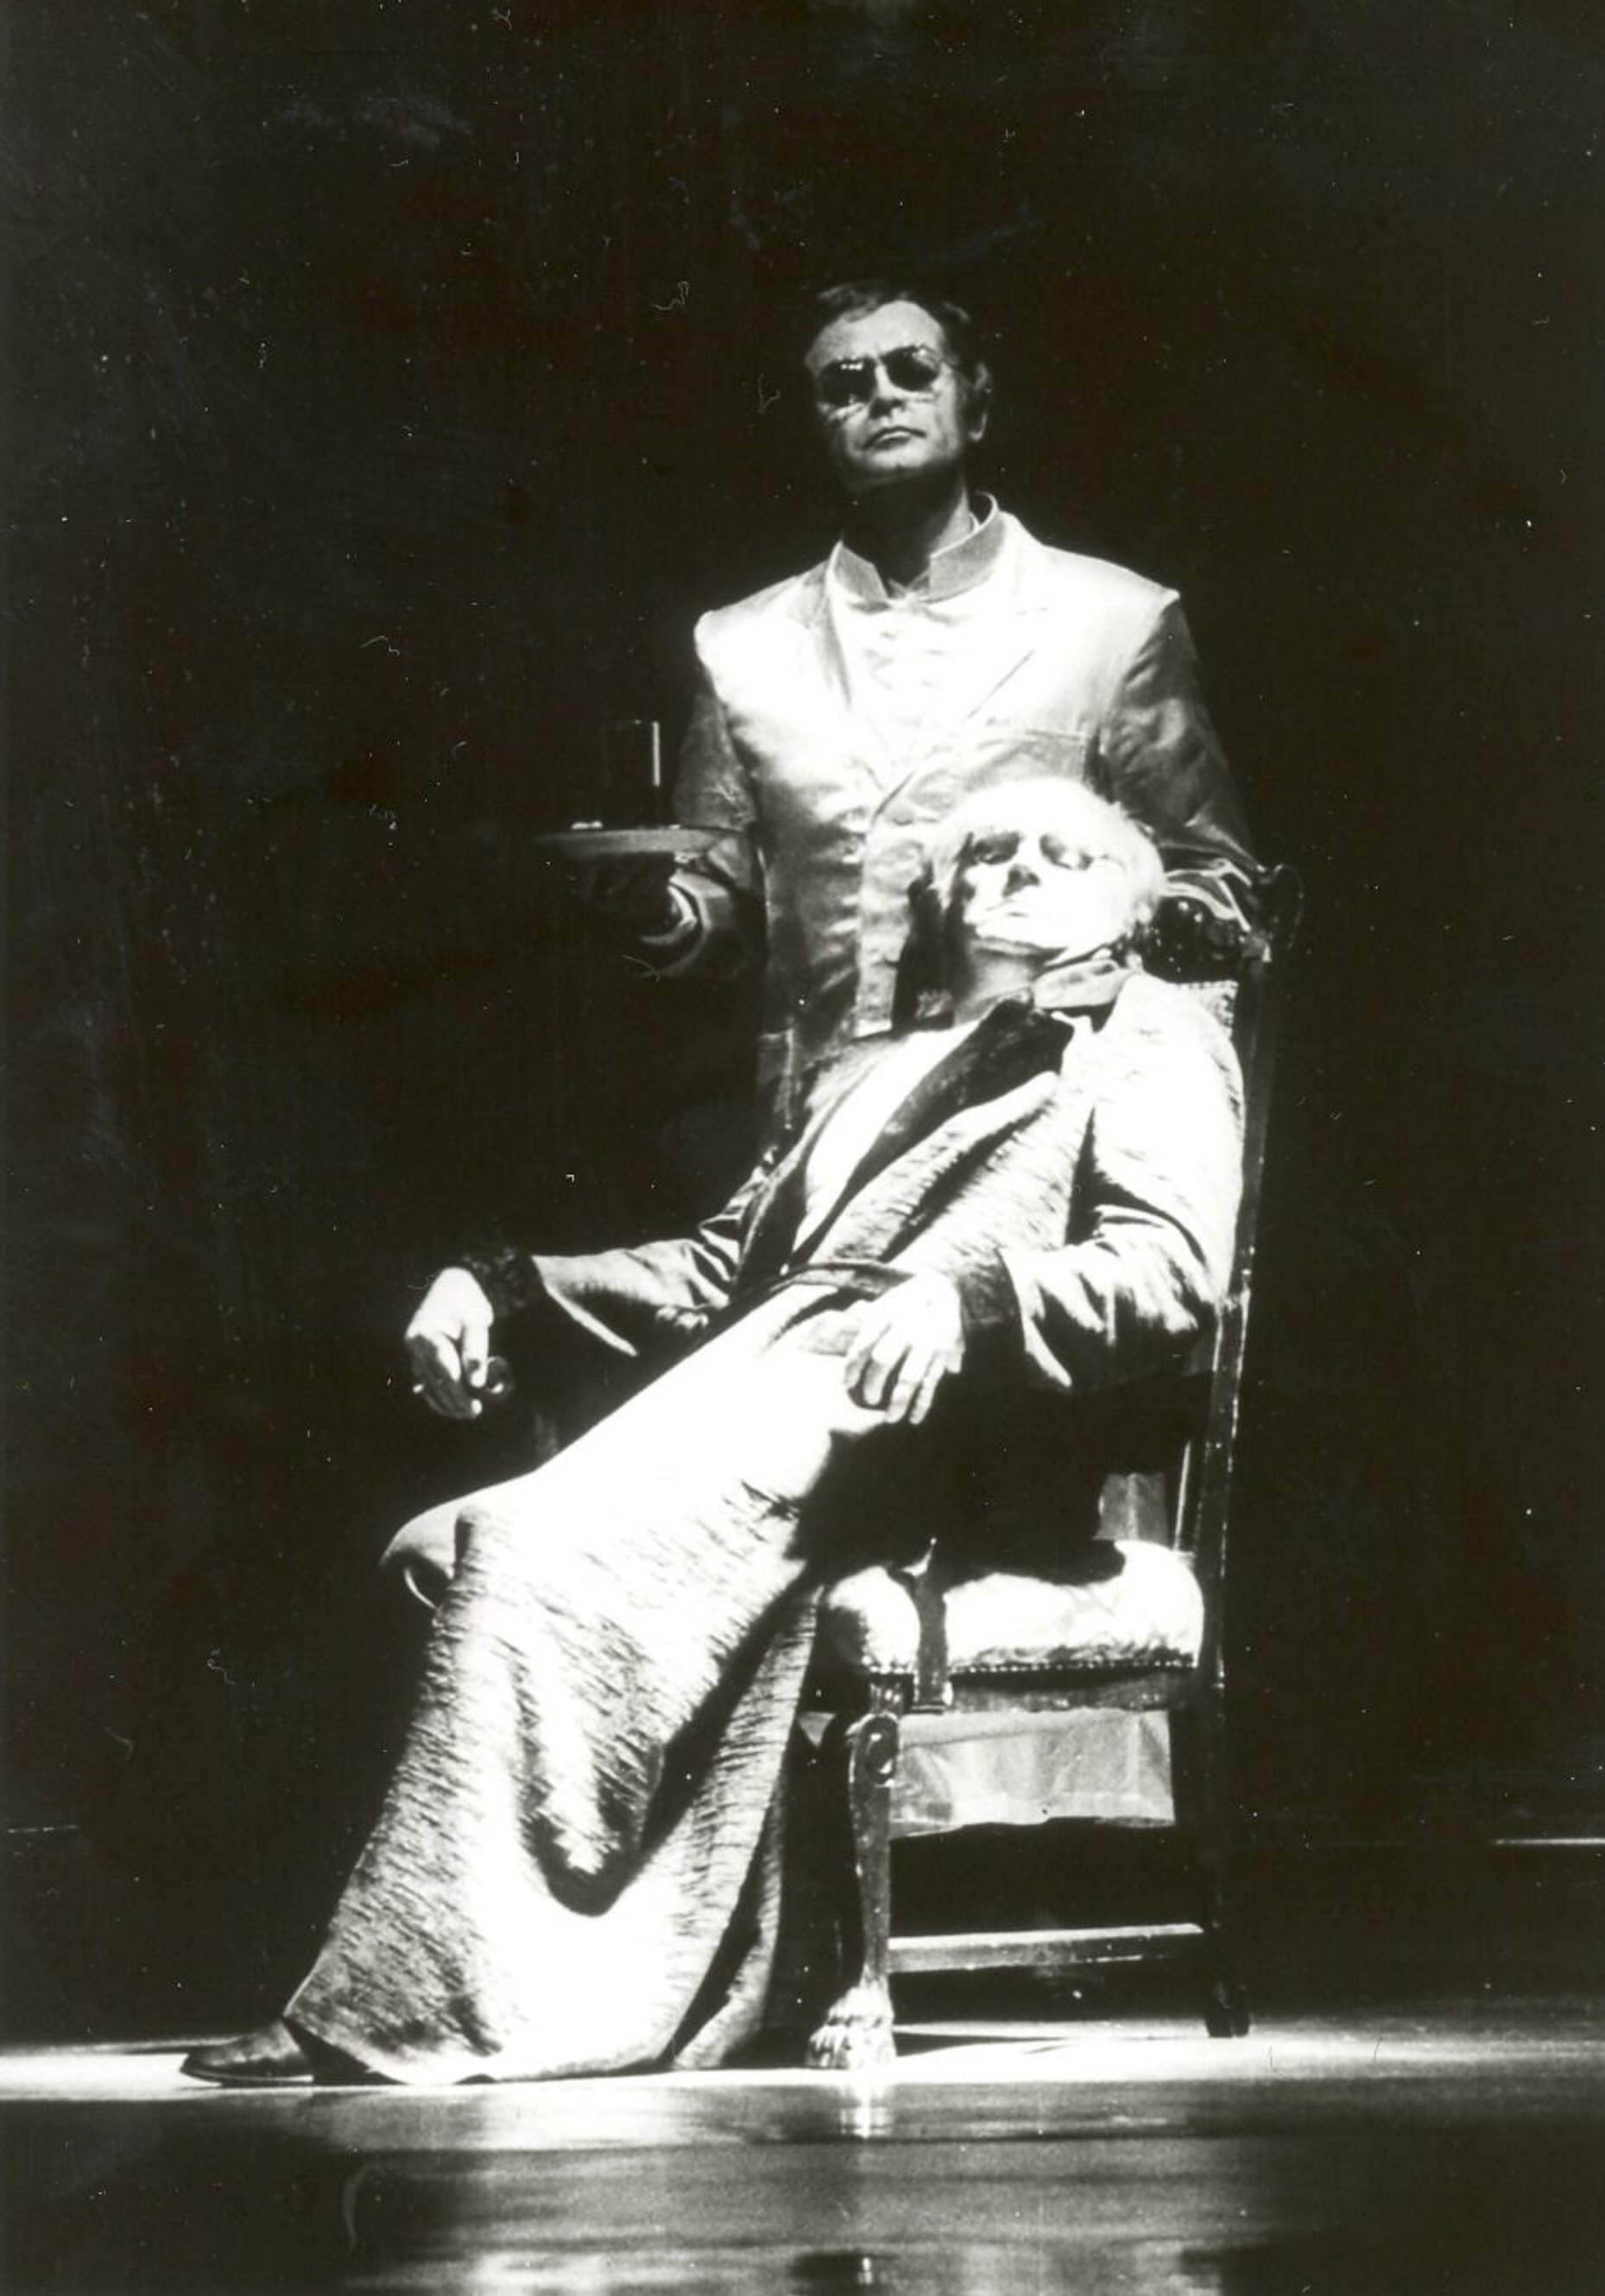

Supplement: bmj_333_7582_1335_v2_1.pdf [file bmj_333_7582_1335_v2_1.pdf]
